# Supplementary material
Source: PubMed Central journal article supplement (PMC3488072)
Supplement: supp_M112.348599_jbc.M112.348599-1.pdf [file supp_M112.348599_jbc.M112.348599-1.pdf]

Supplemental Figure 1

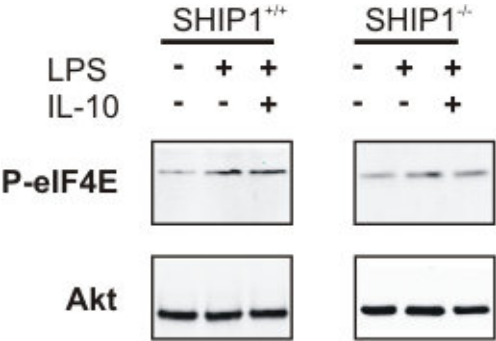

Supplemental Figure 2

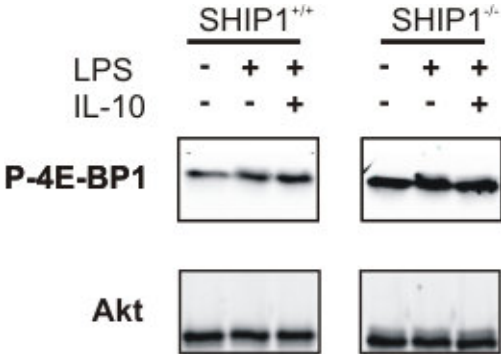

Supplemental Figure 3

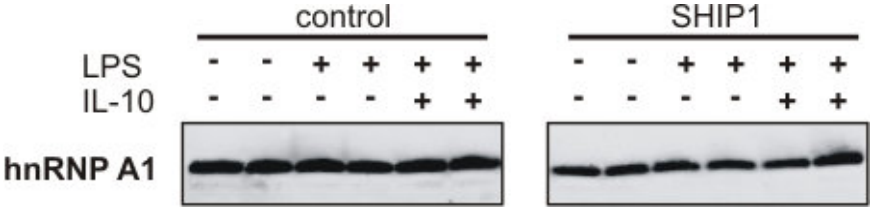

## **SUPPLEMENTAL FIGURE LEGENDS**

**SUPPLEMENTAL FIG 1.** IL-10 does not inhibit eIF4E phosphorylation. Immunoblot analysis of cell lysates of peritoneal macrophages isolated from wildtype (SHIP1<sup>+/+</sup>) or SHIP1 knockout (SHIP1<sup>-/-</sup>) mice stimulated with 1 ng/ml LPS in the absence or presence of 100 ng/ml IL-10 for 1 hour. Representative results from three experiments.

**SUPPLEMENTAL FIG 2.** IL-10 does not inhibit 4E-BP1 phosphorylation. Immunoblot analysis of cell lysates of peritoneal macrophages isolated from wildtype (SHIP1<sup>+/+</sup>) or SHIP1 knockout (SHIP1<sup>-/-</sup>) mice stimulated with 1 ng/ml LPS in the absence or presence of 100 ng/ml IL-10 for 1 hour. Representative results from two experiments.

**SUPPLEMENTAL FIG 3.** IL-10 does not affect the interaction between hnRNP A1 and TNF $\alpha$  ARE. Immunoblot analysis of affinity pull down assays using a TNF $\alpha$  ARE oligonucleotide to isolate hnRNP A1 from SHIP1 siRNA cells induced for knockdown (SHIP1) or cells without knockdown induction (control). Cells were stimulated with 1 ng/ml LPS in the absence or presence of 100 ng/ml IL-10 for 30 min (details described in Supplemental Experimental Procedures). Representative results from three experiments.

## SUPPLEMENTAL EXPERIMENTAL PROCEDURES

*TNF $\alpha$  ARE pull downs* - siRNA lentivirus-transduced cells were treated with 2  $\mu$ g/ml of doxycycline 48 hours prior to stimulation, where the cells were re-plated at a density of  $2 \times 10^6$  cells in a 6-well tissue culture plates at ~32 hours. Cells were stimulated with 1 ng/ml LPS +/- 100 ng/ml IL-10 for 30 mins and then rinsed with 2-3 ml cold PBS. Cells were lifted in 300  $\mu$ l of buffer containing 50 mM Tris-HCl (pH 7.4), 150 mM potassium chloride, 1.5 mM magnesium chloride, 0.5 mM dithiothreitol, 0.5% Nonidet P-40, 10% v/v glycerol, 1X EDTA-free Protease Inhibitor Cocktail (Roche Diagnostics, Mississauga ON, Canada), 1X PhosSTOP (Roche Diagnostics, Mississauga ON, Canada) and 50 U/ml RNase Protector (Roche Diagnostics, Mississauga ON, Canada) with a cell scraper and lysed for 30 min at 4  $^{\circ}$ C. The soluble lysates were collected by centrifugation at 12,000 g for 15 min. Yeast tRNA (Sigma, Burlington, ON) was added to the clarified lysate to a final of 0.1 mg/ml and 100  $\mu$ l of the mixture was added to 30 pmol of 5' biotinylated RNA oligos corresponding to the TNF $\alpha$  ARE sequence (UUAUUUUUUUUUUUUUUUUUUUUUUUUUUUUUUUUUU) or a non-specific sequence (AAGCUUGGGCUGCAGGUCGACUCUAGAGGAACCUA) and incubated end-over-end at 4  $^{\circ}$ C for 2 hours. The mixture was then added to 50  $\mu$ l slurry of nuclease-free BioMag streptavidin magnetic beads and incubated end-over-end at 4  $^{\circ}$ C for 1.5 hours. The beads were then washed three times with 150  $\mu$ l buffer containing 50 mM Tris-HCl (pH 7.4), 100 mM potassium chloride, 1.5 mM magnesium chloride, 0.5 mM dithiothreitol, 0.2 mM EDTA, and 10% v/v glycerol. Proteins were eluted by the addition of 2X Laemmli solubilization buffer and analyzed by immunoblotting using anti-hnRNP A1 (Sigma, Burlington, ON).
